# Supplementary material for: Structural determinants of specific DNA-recognition by the THAP zinc finger
Source: PubMed Central journal article supplement — Nucleic Acids Res. 2010 Feb 9;38(10):3466–76. doi: 10.1093/nar/gkq053 (PMC2879526; doi:10.1093/nar/gkq053), 2010-02-09
Supplement: gkq053_1.pdf [file gkq053_1.pdf]

## Supplementary Material

### Structural determinants of specific DNA-recognition by the THAP zinc finger

Sébastien Campagne, Olivier Saurel, Virginie Gervais and Alain Milon

**Supplementary Figure 1.**  $^{15}\text{N}$  longitudinal ( $R_1$ ) and transverse ( $R_2$ ) relaxation rates along the sequence for the THAP zinc finger of THAP1 in its DNA-bound state. Secondary structure elements are shown on the above panel.

**Supplementary Figure 2.** Influence of ionic strength on nonspecific DNA binding. **(A)** Plot showing the evolution of fluorescence anisotropy of Trp36 as a function of increased DNA at 250 (green), 150 (blue) and 30 (red) mM NaCl. **(B)** Overlay of 2D  $^1\text{H}$ - $^{15}\text{N}$  HSQC spectra of the protein in the absence (black) and in the presence of nonspecific DNA at 250 (green), 150 (blue) and 30 (red contour levels) mM NaCl. Residues that undergo chemical shift change of their backbone amide nitrogen upon decreasing NaCl concentration are indicated.

**Supplementary Table 1.** Intermolecular NOEs extracted from 3D  $^{15}\text{N}$  HSQC NOESY, 3D  $^{13}\text{C}_{\text{ali}}$  HSQC NOESY and 3D  $^{13}\text{C}_{\text{aro}}$  HSQC NOESY.

**Supplementary Table 2.** Hydrogen bonds observed in the NMR structure of the complex formed by the THAP zinc finger of THAP1 and the 16 bp rrm1 DNA target.

**Supplementary Table 3.** Hydrophobic contacts observed in the NMR structure of the complex formed by THAP zinc finger of THAP1 and the 16 bp rrm1 DNA target.

Campagne et al.  
Supplementary Figure 1

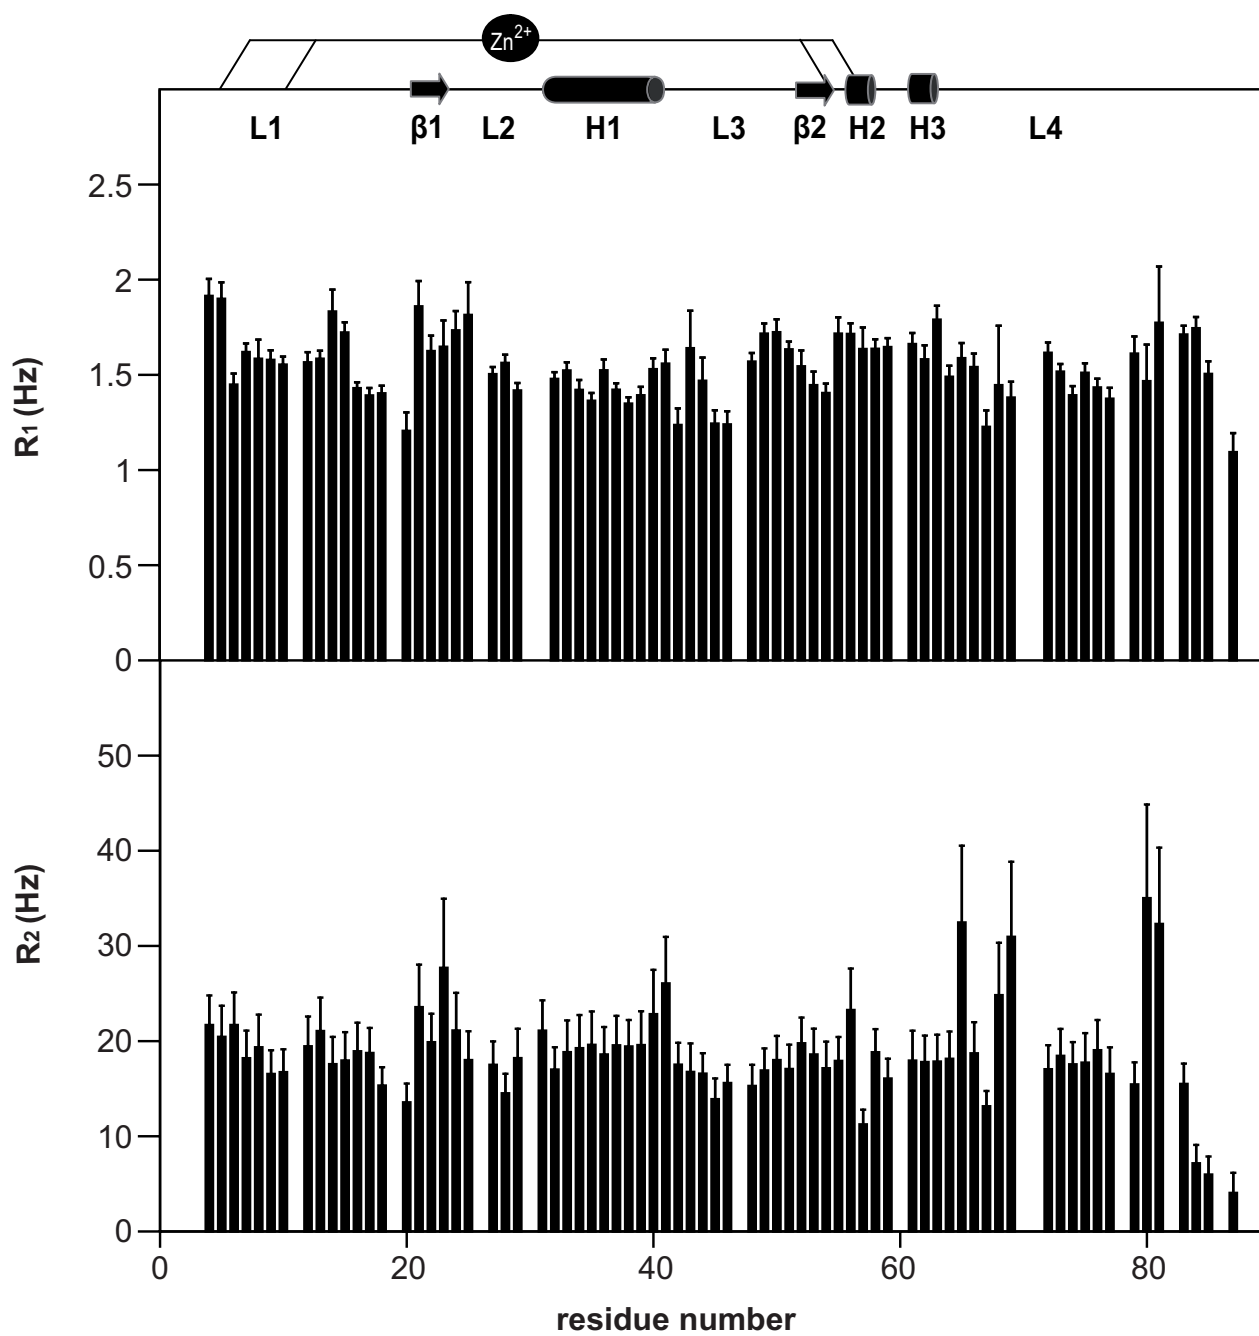

Campagne et al.  
Supplementary Figure 2

A

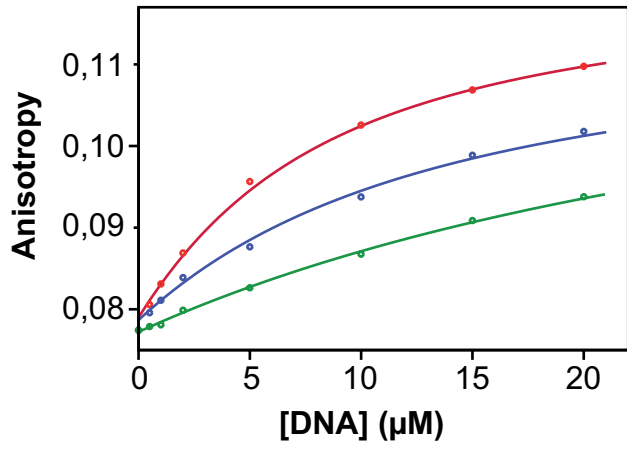

B

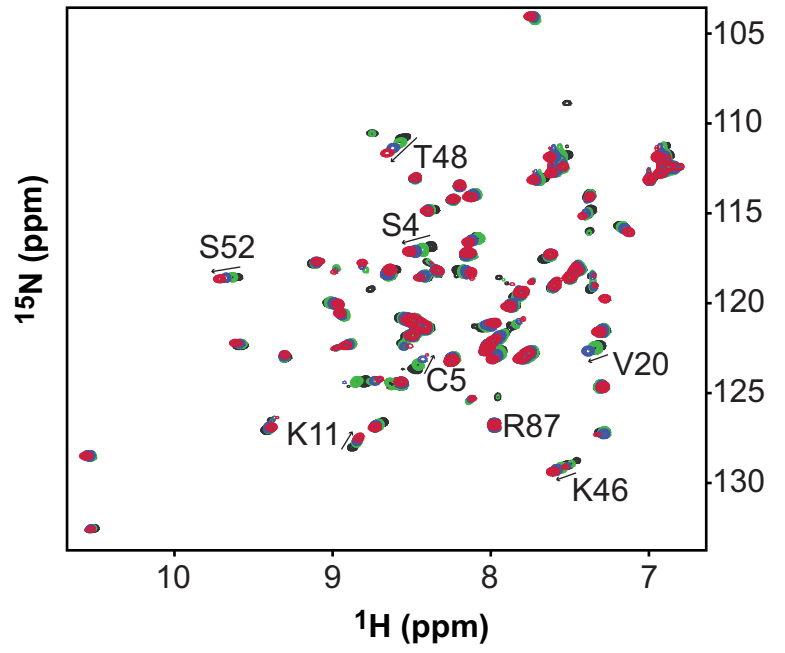

**Campagne *et al.***  
**Supplementary Table 1**

| <b>Amino acid atom</b> | <b>Nucleic acid atom</b> | <b>Interaction strength</b> |
|------------------------|--------------------------|-----------------------------|
| H <sub>N</sub> Lys 24  | H <sub>2</sub> ' Thy 8   | low                         |
|                        | H <sub>3</sub> ' Thy 8   | low                         |
|                        | H <sub>5</sub> ' Thy 8   | low                         |
| H <sub>β</sub> Asn 44  | H <sub>4</sub> ' Cyt 19  | low                         |
| H <sub>α</sub> Pro 47  | H <sub>41</sub> Cyt 22   | medium                      |
|                        | H <sub>5</sub> Cyt 22    | low                         |
|                        | H <sub>6</sub> Cyt 22    | low                         |
| H <sub>N</sub> Thr 48  | H <sub>41</sub> Cyt 22   | strong                      |
|                        | H <sub>5</sub> Cyt22     | medium                      |
|                        | H <sub>6</sub> Cyt 22    | low                         |
|                        | H <sub>8</sub> Gua 21    | strong                      |
|                        | H <sub>5</sub> Cyt 22    | medium                      |
| H <sub>α</sub> Thr48   | H <sub>5</sub> Cyt 22    | medium                      |
| H <sub>β</sub> Thr48   | H <sub>5</sub> Cyt 22    | strong                      |
| H <sub>γ2</sub> Thr48  | H <sub>41</sub> Cyt 22   | medium                      |
|                        | H <sub>6</sub> Cyt 22    | low                         |
|                        | H <sub>3</sub> ' Gua 21  | strong                      |
|                        | H <sub>4</sub> ' Gua 21  | low                         |
|                        | H <sub>5</sub> Cyt 22    | low                         |
| H <sub>N</sub> Lys 49  | H <sub>5</sub> Cyt 22    | strong                      |
| H <sub>N</sub> Tyr 50  | H <sub>5</sub> Cyt 22    | low                         |
|                        | H <sub>5</sub> Cyt 23    | low                         |
|                        | H <sub>6</sub> Cyt 23    | low                         |
|                        | H <sub>5</sub> Cyt 22    | low                         |
|                        | H <sub>5</sub> Cyt 23    | medium                      |
| H <sub>β1</sub> Tyr 50 | H <sub>5</sub> Cyt 22    | medium                      |
|                        | H <sub>5</sub> Cyt 23    | medium                      |
| H <sub>β2</sub> Tyr 50 | H <sub>5</sub> Cyt 22    | medium                      |
|                        | H <sub>5</sub> Cyt 23    | medium                      |
| H <sub>N</sub> Ser 51  | H <sub>5</sub> Cyt 22    | medium                      |
|                        | H <sub>41</sub> Cyt 22   | strong                      |
|                        | H <sub>6</sub> Cyt 22    | low                         |
| H <sub>α</sub> Ser 51  | H <sub>41</sub> Cyt 22   | strong                      |
|                        | H <sub>6</sub> Cyt 22    | low                         |
|                        | H <sub>42</sub> Cyt 22   | medium                      |
| H <sub>β</sub> Ser 51  | H <sub>41</sub> Cyt 22   | medium                      |
|                        | H <sub>6</sub> Cyt 22    | low                         |
| H <sub>δ</sub> Arg 65  | H <sub>2</sub> Ade 27    | low                         |
| H <sub>δ2</sub> Leu 71 | H <sub>1</sub> ' Gua 7   | long                        |
|                        | H <sub>3</sub> ' Gua 7   | medium                      |

**Campagne *et al.***  
**Supplementary Table 2**

| <b>Hydrogen bonds</b> |             |             |             |                     |                   |
|-----------------------|-------------|-------------|-------------|---------------------|-------------------|
| <b>Protein</b>        | <b>Atom</b> | <b>Base</b> | <b>Atom</b> | <b>Distance (Å)</b> | <b>No (of 15)</b> |
| Gln3                  | OE          | CYT12       | H41         | 2.08 ± 0.09         | 15                |
| Gln3                  | HE2*        | THY20       | O4          | 2.15 ± 0.05         | 15                |
| Lys11                 | HZ*         | CYT19       | O1P         | 1.85 ± 0.15         | 15                |
| Arg13                 | HH1*        | GUA10       | O1P         | 2.08 ± 0.21         | 3                 |
| Arg13                 | HH2*        | GUA11       | O2P         | 2.23 ± 0.00         | 3                 |
| Tyr14                 | HH          | GUA9        | O1P         | 1.81 ± 0.11         | 15                |
| Phe22                 | HN          | GUA9        | O2P         | 2.44 ± 0.04         | 2                 |
| Lys24                 | HN          | THY8        | O2P         | 2.08 ± 0.08         | 15                |
| Lys24                 | HZ*         | THY8        | O4          | 2.37 ± 0.10         | 15                |
| Lys24                 | HZ*         | GUA9        | O6          | 2.19 ± 0.02         | 14                |
| Thr28                 | HG1         | GUA7        | O1P         | 1.82 ± 0.04         | 15                |
| Lys46                 | HZ*         | THY20       | O1P         | 2.24 ± 0.16         | 5                 |
| Lys46                 | HZ*         | THY20       | O2P         | 1.92 ± 0.11         | 15                |
| Thr48                 | HG1         | CYT22       | O2P         | 1.86 ± 0.05         | 15                |
| Tyr50                 | O           | CYT23       | H41         | 1.92 ± 0.03         | 15                |
| Tyr50                 | HH          | CYT23       | O2P         | 2.04 ± 0.08         | 15                |
| Ser51                 | OG          | CYT22       | H41/H42     | 2.32 ± 0.10         | 6                 |
| Ser52                 | HG          | GUA10       | N7          | 2.28 ± 0.03         | 14                |
| Lys64                 | HZ*         | THY8        | O2P         | 1.86 ± 0.12         | 12                |
| Arg65                 | HH1*        | THY6        | O2          | 2.48 ± 0.00         | 1                 |
| Arg65                 | HH1*        | GUA7        | O4'         | 1.95 ± 0.03         | 15                |
| Lys70                 | HZ*         | ADE29       | O3'         | 1.99 ± 0.22         | 10                |
| Lys70                 | HZ*         | ADE30       | O1P         | 2.35 ± 0.09         | 4                 |

**Campagne *et al.***  
**Supplementary Table 3**

| <b>Hydrophobic contacts</b> |             |             |             |                     |                   |
|-----------------------------|-------------|-------------|-------------|---------------------|-------------------|
| <b>Protein</b>              | <b>Atom</b> | <b>Base</b> | <b>Atom</b> | <b>Distance (Å)</b> | <b>No (of 15)</b> |
| Lys24                       | CB          | THY8        | C7          | 3.65 ± 0.10         | 14                |
|                             | CG          | THY8        | C7          | 3.45 ± 0.09         | 3                 |
|                             | CD          | THY8        | C7          | 3.55 ± 0.12         | 11                |
|                             | CE          | THY8        | C7          | 3.63 ± 0.10         | 10                |
| Thr28                       | CG2         | THY6        | C3'         | 3.72 ± 0.18         | 11                |
| Pro47                       | CA          | THY20       | C2'         | 3.69 ± 0.10         | 14                |
|                             | CA          | GUA21       | C8          | 3.84 ± 0.03         | 9                 |
|                             | CB          | GUA21       | C8          | 3.70 ± 0.05         | 12                |
|                             | CG          | THY20       | C2'         | 3.83 ± 0.06         | 12                |
|                             | CG          | THY20       | C6          | 3.82 ± 0.05         | 6                 |
|                             | CD          | THY20       | C2'         | 3.85 ± 0.05         | 9                 |
|                             | Thr48       | CG2         | GUA21       | C2'                 | 3.37 ± 0.05       |
| Tyr50                       | CG2         | GUA21       | C3'         | 3.56 ± 0.03         | 15                |
|                             | CB          | CYT22       | C4          | 3.73 ± 0.06         | 15                |
|                             | CB          | CYT22       | C5          | 3.20 ± 0.02         | 15                |
|                             | CB          | CYT22       | C6          | 3.32 ± 0.02         | 15                |
|                             | CB          | CYT23       | C4          | 3.88 ± 0.01         | 7                 |
|                             | CB          | CYT23       | C5          | 3.57 ± 0.03         | 15                |
|                             | CD1         | CYT22       | C2'         | 3.84 ± 0.04         | 10                |
|                             | CD1         | CYT23       | C5          | 3.14 ± 0.02         | 15                |
|                             | CD1         | CYT23       | C6          | 3.85 ± 0.02         | 13                |
|                             | CD2         | CYT22       | C2'         | 3.15 ± 0.03         | 15                |
|                             | CD2         | CYT22       | C5          | 3.63 ± 0.03         | 15                |
|                             | CD2         | CYT22       | C6          | 3.08 ± 0.03         | 15                |
|                             | CE1         | CYT22       | C2'         | 3.81 ± 0.04         | 9                 |
|                             | CE2         | CYT22       | C2'         | 3.13 ± 0.03         | 15                |
|                             | CE2         | CYT22       | C3'         | 3.84 ± 0.04         | 14                |
|                             | CG          | CYT22       | C2'         | 3.55 ± 0.03         | 15                |
|                             | CG          | CYT22       | C5          | 3.83 ± 0.02         | 15                |
|                             | CG          | CYT22       | C6          | 3.46 ± 0.02         | 15                |
|                             | CG          | CYT23       | C5          | 3.62 ± 0.04         | 15                |
|                             | CG          | CYT22       | C2'         | 3.50 ± 0.04         | 15                |
|                             | Arg65       | CD          | GUA7        | C4'                 | 3.38 ± 0.11       |
